# Supplementary material for: Development of cultured Plasmodium falciparum blood-stage malaria cell banks for early phase in vivo clinical trial assessment of anti-malaria drugs and vaccines
Source: Springer Nature journal article supplement (doi:10.1186/s12936-015-0663-x), 2015-04-06
Supplement: MOESM1 [file 9761204]

**Supplementary Table 1:** Release criteria for *P. falciparum* blood-stage malaria cell banks.

| Test Description                    | Specification                                                                                                                   | Service Provider                                                               |
|-------------------------------------|---------------------------------------------------------------------------------------------------------------------------------|--------------------------------------------------------------------------------|
| Parasite Stage                      | >75% ring stage parasites                                                                                                       | Griffith University<br>Q-Gen                                                   |
| % Parasitemia                       | >1% ring stage parasitemia                                                                                                      | Griffith University<br>Q-Gen                                                   |
| Viability                           | Viable parasites upon thawing                                                                                                   | Griffith University<br>QIMR Berghofer<br>Medical Research<br>Institute (QIMRB) |
| Sterility testing                   | Report no growth                                                                                                                | Biotest<br>Pathology QLD                                                       |
| Mycoplasma testing                  | Report not detected                                                                                                             | ams Laboratories<br>Q-Gen                                                      |
| Endotoxin testing                   | Report <1250EU/ml                                                                                                               | ams Laboratories<br>Q-Gen                                                      |
| Viral testing                       | Report not detected                                                                                                             | Charles River                                                                  |
| Drug sensitivity for anti-malarials | Report <i>in vitro</i> susceptibility to anti-malarial compounds as determined by IC <sub>50</sub> and IC <sub>90</sub> values. | Australian Army<br>Malaria Institute                                           |
