# Supplementary material for: Development of cultured Plasmodium falciparum blood-stage malaria cell banks for early phase in vivo clinical trial assessment of anti-malaria drugs and vaccines
Source: Springer Nature journal article supplement (doi:10.1186/s12936-015-0663-x), 2015-04-06
Supplement: MOESM2 [file 9761204]

**Supplementary Table 2:** *In vitro* anti-malaria activities (IC<sub>50</sub> and IC<sub>90</sub>) of 10 compounds against the *P. falciparum* strain D6.

| Compound           | Maximal concentration tested (nM) | IC <sub>50</sub> (nM) |                     | IC <sub>90</sub> (nM) |                     |
|--------------------|-----------------------------------|-----------------------|---------------------|-----------------------|---------------------|
|                    |                                   | Average (n=2)         | Std Deviation (n=2) | Average (n=2)         | Std Deviation (n=2) |
| Artemether         | 50                                | 4.7                   | 0.7                 | 7.8                   | 0.6                 |
| Artesunate         | 50                                | 3.4                   | 0.1                 | 5.6                   | 0.2                 |
| Dihydroartemisinin | 35                                | 1.9                   | 0.1                 | 4.1                   | 0.8                 |
| Atovaquone         | 25                                | 0.10                  | 0.01                | 0.8                   | 0.2                 |
| Mefloquine         | 728                               | 40                    | 1                   | 86                    | 27                  |
| Piperaquine        | 200                               | 23                    | 2                   | 34                    | 9                   |
| Lumefantrine       | 800                               | 108                   | 12                  | 356                   | 38                  |
| Chloroquine        | 250                               | 12.9                  | 4.4                 | 18.5                  | 7.4                 |
| Pyrimethamine      | 50                                | 0.59                  | 0.04                | 0.95                  | 0.05                |
| Proguanil          | 200,000                           | 312                   | 41                  | 1,246                 | 640                 |
