# Supplementary material for: Development of cultured Plasmodium falciparum blood-stage malaria cell banks for early phase in vivo clinical trial assessment of anti-malaria drugs and vaccines
Source: Springer Nature journal article supplement (doi:10.1186/s12936-015-0663-x), 2015-04-06
Supplement: MOESM3 [file 9761204]

**Supplementary Table 3:** *In vitro* anti-malaria activities (IC<sub>50</sub>) of 8 compounds against the *P. falciparum* strain 3D7.

| <b>Compound</b>    | <b>IC<sub>50</sub><br/>(pmol/well)</b> |
|--------------------|----------------------------------------|
| Amodiaquine        | 1.55                                   |
| Artemisinin        | 0.029                                  |
| Chloroquine        | 0.49                                   |
| Dihydroartemisinin | 0.27                                   |
| Mefloquine         | 3.21                                   |
| Pyronaridine       | <0.122                                 |
| Quinine            | 4.13                                   |
| Sulphadoxine       | 4702.6                                 |
